# Supplementary material
Source: publisher figshare collection journal article supplement (https://karger.figshare.com/ndownloader/files/16499318)
Supplement: Supplementary file 1 [file 16499318]

**Supplementary Table 1. Classification of Explicit Definitions and Implicit Definitions of Term ‘Overdiagnosis’**

| **Category** | **Coding Definition** |
| --- | --- |
| **Consistent Usage** | |
| Overdefinition | Coded when authors discussed correctly applied existing or changed diagnostic criteria that resulted in the diagnosis of people with transitory or mild symptoms that reflect normal experiences, despite meeting diagnostic criteria, and who would not benefit from medical intervention. |
| Overdetection | Coded when authors described the screening of asymptomatic individuals and diagnosis of abnormalities that would not have caused symptoms or death in their lifetime because they would not have progressed, would have progressed too slowly to cause harm, or would have resolved spontaneously. |
| **Inconsistent Usage** | |
| Misdiagnosis | Coded when authors discussed patients who (1) were incorrectly diagnosed with one disorder rather than another or (2) received a diagnosis for a mental disorder without meeting diagnostic criteria for any mental disorder. |
| False-positive Test Results | Coded when authors described the number of patients with positive screening tests who were subsequently found to not meet diagnostic criteria during standard follow-up assessment procedures conducted as part of a screening program. |
| Overtreatment | Coded when authors described people correctly diagnosed with a disorder who received a treatment even though the treatment being applied does not have evidence for treating the condition effectively. Overtreatment can result from overdiagnosis but is a distinct concept. |
| Overtesting | Coded when described a test being applied too frequently to individual patients or to people outside of the indicated target group with possible ramifications for overdiagnosis. |
